# Supplementary material for: Hand-arm vibration and the risk of vascular and neurological diseases—A systematic review and meta-analysis
Source: PLoS One. 2017 Jul 13;12(7):e0180795. doi: 10.1371/journal.pone.0180795 (PMC5509149; doi:10.1371/journal.pone.0180795)
Supplement: S2 Table — (XLSX) [file pone.0180795.s002.xlsx]

## Sheet: Quality score
		Raynaud’s phenomenon							Neurosensory symptoms								Carpal tunnel syndrome							Method			Exposure
Study	Reference	Subjective symptom description	Clinical investigation	Objective investigation	Control of diagnostic methods	Checking for diff. diagnosis alternatively cause	Stadium classified	Diagnosis sum	Subjective symptom description	Clinical investigation	Objective investigation	Semi-objective investigation	Control of diagnostic methods	Checking for diff. diagnosis alternatively cause	Stadium classified	Diagnosis sum	Subjective symptom description	Clinical investigation	Objective investigation	Control of diagnostic methods	Checking for diff. diagnosis alternatively cause	Stadium classified	Diagnosis sum	Study design	Selection	Control of individual confounding factors	Current exposure acceleration (m/s2)	Current exposure time (hours/day)	Information about previous acceleration	Information about previous exposure (years)	Information about previous exposure (hours/day)	Sum of method and exposure
Aiba, 2012	[20]	3	2	0	0	1	2	8																6	0	2	1	1	1	1	1	13
Anttonen, 1994	[62]	1	0	0	0	0	0	1	1	0	0	0	0	0	0	1								2	2	2	2	1	0	1	1	11
Barregard, 2003	[21]	3	2	0	0	1	2	8	3	2	0	0	0	1	2	8								4	2	2	1	2	0	1	0	12
Bovenzi, 1980	[64]	0	0	1	1	0	0	2	1	0	0	0	0	0	0	1								2	2	0	2	1	0	1	0	8
Bovenzi, 1994	[49]	3	2	0	0	1	2	8	3	2	0	0	0	1	2	8	3	2	0	0	1	0	6	2	2	2	2	1	0	1	1	11
Bovenzi, 1998	[35]	3	2	2	1	1	2	11																2	2	2	2	2	0	2	1	13
Bovenzi, 2008	[38]	3	2	2	1	1	2	11																6	2	2	2	2	0	2	0	16
Bovenzi, 2010	[42]	3	2	2	1	1	0	9																6	2	2	2	2	0	1	1	16
Bovenzi, 2010	[40]	3	2	2	1	1	0	9																6	2	2	2	2	1	1	1	17
Bovenzi, 1998	[43]	3	2	2	1	1	2	11																6	2	2	2	2	2	1	1	18
Bovenzi, 2008	[36]	3	2	2	1	1	2	11																6	2	2	2	2	1	1	1	17
Bovenzi, 2005	[56]	3	2	0	0	1	0	6	1	0	0	0	1	0	0	2	3	2	4	0	1	0	10	2	2	2	2	1	0	0	0	9
Bovenzi, 1995	[41]	3	2	2	1	1	2	11																2	2	2	2	2	2	1	1	14
Bovenzi, 1988	[47]	3	2	1	1	1	2	10	3	2	0	0	0	1	2	8								2	2	2	2	1	0	0	0	9
Bovenzi, 2000	[39]	3	2	2	1	1	2	11	3	2	2	0	1	1	0	9	3	2	4	1	1	0	11	4	2	2	2	1	2	1	1	15
Bovenzi, 1985	[48]	3	2	1	1	0	2	9	3	2	0	0	0	0	2	7								2	2	2	2	1	0	1	0	10
Bovenzi, 2011	[45]	3	2	0	0	1	2	8																6	2	0	2	2	1	1	1	15
Bovenzi, 2011	[69]								3	2	0	2	1	1	2	11								6	2	2	2	2	0	0	0	14
Brubaker, 1985	[59]	1	0	1	0	1	2	5	1	0	0	0	0	1	2	4								2	2	0	2	1	0	1	1	9
Brubaker, 1987	[22]	1	0	2	0	1	2	6																6	0	2	2	1	0	0	0	11
Burdorf, 1991	[60]	1	0	0	0	0	2	3	1	0	0	0	0	0	2	3								2	2	2	2	2	0	1	0	11
Burstrom, 2010	[66]	1	0	0	0	0	0	1																2	2	2	1	0	0	0	0	7
Chatterjee, 1978	[58]	1	2	0	0	1	2	6	1	2	0	0	0	1	2	6								2	2	0	2	1	1	0	0	8
Cherniack, 2004	[61]	1	0	0	0	0	2	3	1	0	0	0	0	0	2	3								2	2	2	2	1	0	1	1	11
Edlund, 2013	[70]								1	0	0	0	0	1	0	2	1	0	0	0	0	0	1	6	2	0	2	2	2	1	1	16
Futatsuka, 2005	[52]	3	2	1	1	0	0	7	3	2	0	2	1	0	0	8								2	2	0	2	2	0	2	0	10
Futatsuka, 1985	[23]	1	0	1	0	0	0	2																6	2	0	2	1	2	1	1	15
Gerhardsson, 2005	[24]								0	2	2	2	0	0	0	6	0	2	4	0	0	0	6	2	0	0	2	2	1	1	1	9
Hagberg, 2008	[46]	1	2	0	0	1	0	4																6	2	2	2	1	2	1	1	17
Harazin, 1996	[25]	3	2	1	0	0	0	6																2	2	0	2	1	0	1	0	8
Ho, 1986	[29]								3	2	2	2	1	1	0	11								2	2	0	1	1	1	1	0	8
Jang, 2002	[54]	1	0	0	0	1	2	4	1	0	0	0	0	1	2	4								2	2	2	2	2	0	1	1	12
Koskimies, 1992	[26]	3	2	0	0	1	0	6	3	2	0	0	0	0	0	5								2	2	0	2	1	2	1	1	11
Letz, 1992	[57]	1	0	0	0	1	2	4	1	0	0	0	0	1	2	4								2	2	2	2	1	0	1	1	11
Lundstrom, 1999	[30]								0	2	0	2	1	1	0	6								2	2	2	2	1	0	1	0	10
Malchaire, 2001	[72]								1	0	0	0	0	1	2	4								2	2	2	2	1	0	1	0	10
Matsumoto, 1995	[71]								3	2	2	2	0	0	0	9								2	2	0	2	0	0	0	0	6
Mirbod, 1999	[27]	3	2	1	1	1	0	8	3	2	0	2	1	1	0	9								6	2	2	2	1	0	1	0	14
Mirbod, 1994	[67]	1	0	0	0	0	0	1	1	0	0	0	0	0	0	1								2	0	0	2	1	0	1	0	6
Mirbod, 1992	[44]	3	2	2	1	1	2	11	3	2	0	2	1	1	2	11								4	2	2	2	1	0	1	0	12
Musson, 1989	[28]	1	0	0	0	0	0	1	1	0	0	0	0	0	0	1								2	0	2	2	1	0	1	1	9
Nilsson, 1989	[50]	3	2	0	0	0	2	7																2	2	2	2	2	0	1	1	12
Nilsson, 2008	[31]								3	2	0	2	1	1	0	9								2	2	2	1	1	1	1	1	11
Nilsson, 1994	[32]																3	2	4	1	1	0	11	2	2	2	2	2	0	1	0	11
Nilsson, 2001	[33]								3	2	0	2	0	1	0	8								2	2	2	2	2	0	1	1	12
Palmer, 1998	[51]	2	2	1	0	0	2	7	2	2	0	0	0	0	2	6								2	2	2	1	1	1	1	1	11
Sanden, 2010	[34]																3	2	4	1	1	0	11	2	2	2	2	1	2	1	1	13
Su, 2013	[53]	3	2	0	0	1	0	6	3	2	0	2	1	1	0	9								2	0	2	2	1	1	1	1	10
Tominaga, 1994	[68]	1	0	0	0	0	0	1																2	0	0	1	1	1	1	0	6
Walker, 1985	[65]	1	0	0	0	0	0	1																2	2	2	2	0	0	0	0	8
Virokannas, 1995	[63]	1	0	0	0	0	0	1	1	0	0	0	0	0	0	1								2	2	2	2	1	0	1	1	11
Yamada, 1995	[55]	3	2	1	1	0	2	9	3	2	0	2	1	0	2	10								2	0	0	1	1	1	1	0	6
